# Supplementary material for: Plasma miRNAs as Biomarkers to Identify Patients with Castration-Resistant Metastatic Prostate Cancer
Source: PubMed Central journal article supplement (PMC3645714; doi:10.3390/ijms14047757), 2013-04-10
Supplement: ijms-14-07757-s001.pdf [file ijms-14-07757-s001.pdf]

## Supplementary Information

**Figure S1.** Comparison between mir-30e and mir-16 stability in plasma samples from the 2 analyzed groups. *T* test *p* value = 0.1436 (mir-30e) vs. 0.002 (mir-16). Differences between means:  $0.119 \pm 0.080$  (mir-30e) vs.  $(-0.175) \pm 0.055$  (mir-16). \*\* *p* < 0.01 (*T* test).

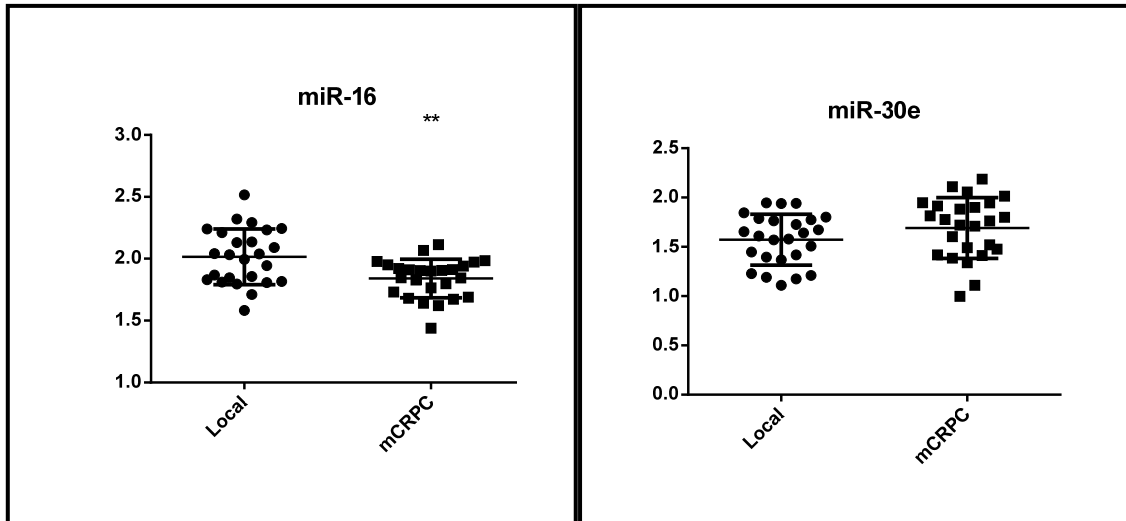

© 2013 by the authors; licensee MDPI, Basel, Switzerland. This article is an open access article distributed under the terms and conditions of the Creative Commons Attribution license (<http://creativecommons.org/licenses/by/3.0/>).
