# Supplementary material for: Plasma miRNAs as Biomarkers to Identify Patients with Castration-Resistant Metastatic Prostate Cancer
Source: MDPI journal article supplement (doi:10.3390/ijms14047757), 2013-04-10
Supplement: s2 [file s2]

## Sheet: Sheet1
miRNA	Local	mCRPC	Local-mCRPC	>1Cq	>2Cq
hsa-let-7a	32.1232	31.381	0.742157
hsa-let-7a*	34.8674	34.0261	0.841346
hsa-let-7b	26.2176	26.6469	-0.429304
hsa-let-7b*	32.4456	31.7659	0.679684
hsa-let-7c	34.5406	33.6878	0.85281
hsa-let-7d	33.209	31.3716	1.83741	**
hsa-let-7d*	30.9237	29.098	1.82571	**
hsa-let-7e	35.8695	33.2034	2.66614	**	***
hsa-let-7f	30.8593	28.7865	2.07273	**	***
hsa-let-7f-1*	36.4952	33.2043	3.29095	**	***
hsa-let-7f-2*	34.6525	32.9706	1.68194	**
hsa-let-7g	28.1767	27.5361	0.640608
hsa-let-7g*	34.4046	33.8717	0.532959
hsa-let-7i	29.4249	29.3504	0.074558
hsa-let-7i*	35.2536	33.7855	1.46814	**
hsa-miR-1	36.9353	31.9319	5.00335	**	***
hsa-miR-9	39.0931	34.7936	4.29943	**	***
hsa-miR-9*	40	34.117	5.88303	**	***
hsa-miR-10b	34.4484	33.4256	1.02282	**
hsa-miR-15a	24.657	25.3202	-0.663189
hsa-miR-15b	28.7196	28.0264	0.693209
hsa-miR-15b*	31.2379	31.9921	-0.75412
hsa-miR-16	22.641	23.9681	-1.3271	**
hsa-miR-16-2*	30.1418	30.112	0.02978
hsa-miR-17	30.4453	30.2072	0.238084
hsa-miR-17*	31.4755	31.0409	0.434561
hsa-miR-18a	31.1346	30.9943	0.140293
hsa-miR-18a*	32.536	33.6335	-1.09741	**
hsa-miR-18b	30.138	28.9799	1.15814	**
hsa-miR-19a	29.367	30.1073	-0.740255
hsa-miR-19b	23.9075	24.0229	-0.115372
hsa-miR-20a	25.1282	25.1482	-0.019997
hsa-miR-20a*	35.721	33.829	1.89195	**
hsa-miR-20b	31.9251	31.7062	0.218906
hsa-miR-21	26.1816	24.8745	1.30708	**
hsa-miR-22	29.2562	29.6005	-0.344366
hsa-miR-22*	32.1008	31.7294	0.371383
hsa-miR-23a	28.3663	26.138	2.22832	**	***
hsa-miR-23b	30.4304	28.3806	2.04985	**	***
hsa-miR-24	27.8801	26.0413	1.83883	**
hsa-miR-24-2*	35.1576	33.2011	1.95643	**
hsa-miR-25	27.4649	28.056	-0.59109
hsa-miR-26a	29.663	27.3638	2.29917	**	***
hsa-miR-26b	29.449	29.7798	-0.33081
hsa-miR-27a	29.0729	27.3061	1.76687	**
hsa-miR-27b	29.1541	27.2497	1.90438	**
hsa-miR-28-3p	33.4053	32.4216	0.98369
hsa-miR-28-5p	36.876	33.0989	3.77714	**	***
hsa-miR-29a	29.8482	29.6085	0.239627
hsa-miR-29b	30.4491	30.5218	-0.072659
hsa-miR-29b-1*	35.2209	33.5236	1.69733	**
hsa-miR-29c	27.9506	27.9823	-0.031711
hsa-miR-30a	33.2787	33.2298	0.048884
hsa-miR-30a*	35.4836	34.3265	1.15704	**
hsa-miR-30b	30.4864	29.5898	0.896696
hsa-miR-30c	31.3001	30.1716	1.12842	**
hsa-miR-30d	31.6351	30.6179	1.01721	**
hsa-miR-30e	31.1335	31.1121	0.021353
hsa-miR-30e*	35.4946	32.39	3.10462	**	***
hsa-miR-32	28.571	28.8515	-0.280512
hsa-miR-33a	33.1733	30.9329	2.24034	**	***
hsa-miR-33b	33.5346	33.9618	-0.4272
hsa-miR-92a	25.3252	25.838	-0.512834
hsa-miR-92b	35.4834	33.8294	1.65403	**
hsa-miR-93	25.8937	25.7384	0.15525
hsa-miR-93*	33.4941	32.4717	1.02237	**
hsa-miR-95	34.9106	34.9832	-0.072624
hsa-miR-99a	34.2791	32.0176	2.26156	**	***
hsa-miR-99b	33.9351	32.6347	1.30041	**
hsa-miR-101	25.8067	26.3257	-0.518973
hsa-miR-103	27.0518	26.1493	0.902495
hsa-miR-103-2*	33.8815	33.3788	0.502664
hsa-miR-106a	26.1114	25.6976	0.413724
hsa-miR-106b	30.3826	31.5038	-1.12123	**
hsa-miR-106b*	35.6092	34.2981	1.31111	**
hsa-miR-107	27.6598	27.7304	-0.07061
hsa-miR-1207-5p	38.0346	34.3464	3.68822	**	***
hsa-miR-122	27.5134	29.0028	-1.48939	**
hsa-miR-122*	34.3957	34.5712	-0.175484
hsa-miR-1224-3p	33.68	35.3541	-1.67409	**
hsa-miR-124	34.9654	33.9864	0.978957
hsa-miR-1247	35.9418	34.2891	1.65272	**
hsa-miR-125a-5p	31.6232	30.0267	1.59652	**
hsa-miR-125b	33.2084	32.5568	0.651652
hsa-miR-125b-2*	40	33.8806	6.11939	**	***
hsa-miR-126	26.4864	24.927	1.55936	**
hsa-miR-126*	28.3672	26.9594	1.4078	**
hsa-miR-1266	33.4162	34.0455	-0.629325
hsa-miR-127-3p	40	32.1597	7.84034	**	***
hsa-miR-128	34.7879	34.4606	0.327293
hsa-miR-130a	31.363	30.1713	1.19174	**
hsa-miR-130b	35.584	34.1052	1.47881	**
hsa-miR-130b*	35.635	34.2605	1.37447	**
hsa-miR-132	32.9179	31.9059	1.01202	**
hsa-miR-133a	34.8929	33.8012	1.09169	**
hsa-miR-133b	35.3915	33.062	2.3295	**	***
hsa-miR-134	32.1434	31.5658	0.577593
hsa-miR-136	34.5807	31.354	3.22672	**	***
hsa-miR-139-5p	32.8055	31.7597	1.04582	**
hsa-miR-140-3p	27.4351	27.9098	-0.474703
hsa-miR-140-5p	32.3077	31.4508	0.856915
hsa-miR-141	35.7619	29.3881	6.37381	**	***
hsa-miR-141*	35.8333	34.3679	1.46546	**
hsa-miR-142-3p	26.9977	25.4448	1.55286	**
hsa-miR-142-5p	30.354	29.1622	1.19179	**
hsa-miR-143	31.2083	30.415	0.793343
hsa-miR-144	24.3126	25.8282	-1.5156	**
hsa-miR-144*	31.0878	31.7064	-0.618603
hsa-miR-145	31.5876	30.1265	1.46111	**
hsa-miR-146a	32.3591	30.2917	2.06741	**	***
hsa-miR-146b-5p	36.0941	34.9468	1.14734	**
hsa-miR-148a	29.5953	28.7331	0.862292
hsa-miR-148b	29.3811	28.1937	1.18743	**
hsa-miR-150	28.0519	28.3233	-0.271379
hsa-miR-151-3p	31.6122	29.2623	2.34992	**	***
hsa-miR-151-5p	30.6882	28.4038	2.28436	**	***
hsa-miR-152	32.1467	31.7616	0.385103
hsa-miR-153	40	34.2315	5.76848	**	***
hsa-miR-1537	33.5765	32.9753	0.60112
hsa-miR-154	34.6397	32.4617	2.17798	**	***
hsa-miR-155	33.6968	33.6739	0.022888
hsa-miR-181a	31.4475	29.918	1.52959	**
hsa-miR-182	36.6296	34.4754	2.1542	**	***
hsa-miR-185	26.563	27.2271	-0.664062
hsa-miR-186	30.0252	29.3659	0.659374
hsa-miR-188-3p	31.4584	31.6075	-0.149122
hsa-miR-188-5p	34.4966	33.8523	0.644375
hsa-miR-1908	35.7704	34.3091	1.46122	**
hsa-miR-1909	35.1344	34.8401	0.294262
hsa-miR-191	31.2701	30.1408	1.12935	**
hsa-miR-1913	34.8656	34.0714	0.79417
hsa-miR-192	29.4539	29.8664	-0.412451
hsa-miR-193a-3p	35.1694	34.7253	0.444102
hsa-miR-193a-5p	35.9943	34.8463	1.14805	**
hsa-miR-193b	33.0387	32.6984	0.34026
hsa-miR-194	31.9937	32.6785	-0.684828
hsa-miR-195	34.1607	32.4788	1.68196	**
hsa-miR-197	33.2431	30.0403	3.20273	**	***
hsa-miR-1972	35.2241	32.3201	2.90401	**	***
hsa-miR-1974	32.3738	28.1922	4.18151	**	***
hsa-miR-1979	29.4377	29.4478	-0.010025
hsa-miR-199a-3p	32.8597	30.2137	2.64595	**	***
hsa-miR-199a-5p	32.9533	28.9306	4.0227	**	***
hsa-miR-199b-5p	34.9063	35.9674	-1.06105	**
hsa-miR-200a	34.2684	31.5188	2.74961	**	***
hsa-miR-200b	40	34.0601	5.93991	**	***
hsa-miR-200c	34.7094	30.2856	4.42379	**	***
hsa-miR-205	32.428	34.8968	-2.46884	**	***
hsa-miR-210	30.7833	30.1428	0.640522
hsa-miR-2110	33.976	35.3152	-1.33915	**
hsa-miR-215	31.5464	32.1579	-0.611515
hsa-miR-221	31.4793	27.6834	3.79589	**	***
hsa-miR-222	29.6076	28.1153	1.49223	**
hsa-miR-223	25.7487	23.3631	2.38556	**	***
hsa-miR-223*	33.8686	33.5932	0.275373
hsa-miR-296-5p	33.6588	35.6408	-1.98197	**
hsa-miR-301a	32.2018	31.8292	0.372661
hsa-miR-301b	40	33.891	6.10896	**	***
hsa-miR-320a	26.9684	26.9016	0.066794
hsa-miR-320b	26.5768	26.1784	0.398397
hsa-miR-324-3p	30.4389	30.5283	-0.089405
hsa-miR-324-5p	32.4849	30.7861	1.69882	**
hsa-miR-326	34.347	31.2237	3.12326	**	***
hsa-miR-328	34.6342	31.1553	3.47887	**	***
hsa-miR-331-3p	31.8034	30.774	1.02937	**
hsa-miR-335	32.9263	31.1308	1.79542	**
hsa-miR-338-3p	32.2604	30.5557	1.7047	**
hsa-miR-339-3p	34.1083	32.4942	1.61415	**
hsa-miR-339-5p	36.5464	33.9902	2.55619	**	***
hsa-miR-342-3p	30.7607	30.4757	0.285002
hsa-miR-345	34.6707	33.5195	1.15115	**
hsa-miR-346	31.3849	32.3346	-0.949696
hsa-miR-34a	32.3055	31.6821	0.623415
hsa-miR-361-3p	34.6567	33.4894	1.1673	**
hsa-miR-363	29.9333	31.0835	-1.15024	**
hsa-miR-365	31.6446	30.7671	0.877438
hsa-miR-374b	33.1662	31.1842	1.982	**
hsa-miR-375	32.9307	27.5172	5.41352	**	***
hsa-miR-376a	36.1788	31.5076	4.67122	**	***
hsa-miR-376b	36.9037	34.0353	2.86838	**	***
hsa-miR-376c	35.3527	31.5751	3.77755	**	***
hsa-miR-377	37.098	34.1961	2.90189	**	***
hsa-miR-378	30.8092	30.8008	0.008404
hsa-miR-382	35.6211	32.9165	2.70463	**	***
hsa-miR-409-3p	40	32.3899	7.6101	**	***
hsa-miR-410	37.3541	33.0986	4.2555	**	***
hsa-miR-411	40	33.9035	6.0965	**	***
hsa-miR-421	33.8965	34.1258	-0.229365
hsa-miR-423-3p	31.7452	28.5715	3.17366	**	***
hsa-miR-423-5p	31.5623	31.6184	-0.0560735
hsa-miR-424	32.4744	32.4438	0.030597
hsa-miR-425	28.2903	28.5159	-0.225578
hsa-miR-425*	33.5445	31.5465	1.998	**
hsa-miR-429	40	32.8156	7.18436	**	***
hsa-miR-450a	35.7294	34.9387	0.790714
hsa-miR-451	18.2088	19.0043	-0.795484
hsa-miR-454	34.4092	34.5384	-0.12915
hsa-miR-484	28.4586	28.2198	0.23884
hsa-miR-485-3p	35.0087	32.1318	2.87688	**	***
hsa-miR-486-3p	33.5006	34.5423	-1.04161	**
hsa-miR-486-5p	25.4374	26.4525	-1.01516	**
hsa-miR-490-3p	34.9591	35.3636	-0.40445
hsa-miR-491-5p	36.1571	34.3403	1.81688	**
hsa-miR-495	35.5967	31.6132	3.98345	**	***
hsa-miR-497	33.4717	30.6764	2.79532	**	***
hsa-miR-501-3p	34.1301	33.8372	0.292872
hsa-miR-501-5p	35.7536	33.8145	1.93912	**
hsa-miR-502-3p	32.9453	32.6395	0.305744
hsa-miR-502-5p	33.4971	34.7329	-1.23579	**
hsa-miR-503	34.9546	32.9392	2.01539	**	***
hsa-miR-505	31.5637	33.1617	-1.59797	**
hsa-miR-532-3p	32.1339	31.752	0.381969
hsa-miR-532-5p	32.787	32.3985	0.3885
hsa-miR-542-5p	35.4425	34.4437	0.99886
hsa-miR-543	34.4296	32.3546	2.07504	**	***
hsa-miR-550	34.8434	37.9729	-3.1295	**	***
hsa-miR-550*	33.896	34.382	-0.485997
hsa-miR-551b	34.2563	33.4367	0.81955
hsa-miR-574-3p	33.9115	30.3199	3.59159	**	***
hsa-miR-577	34.8925	40	-5.10749	**	***
hsa-miR-582-5p	34.6845	33.3608	1.32372	**
hsa-miR-584	35.3461	32.55	2.79609	**	***
hsa-miR-590-5p	29.927	29.0118	0.915203
hsa-miR-598	33.2609	33.1246	0.136313
hsa-miR-624*	32.7985	37.5259	-4.72745	**	***
hsa-miR-625*	36.3526	33.8477	2.50493	**	***
hsa-miR-627	35.3444	33.3934	1.95102	**
hsa-miR-628-3p	33.9544	34.2895	-0.335182
hsa-miR-629	33.8009	33.3425	0.458367
hsa-miR-629*	40	34.8267	5.17327	**	***
hsa-miR-638	34.5754	33.9049	0.670525
hsa-miR-650	35.399	34.8934	0.505634
hsa-miR-652	31.0388	29.6454	1.39334	**
hsa-miR-660	31.4794	32.1625	-0.683165
hsa-miR-664	36.4689	34.9131	1.55579	**
hsa-miR-671-5p	35.2487	33.8455	1.40322	**
hsa-miR-675*	35.7119	34.8426	0.869271
hsa-miR-720	29.3484	27.6257	1.72274	**
hsa-miR-744	36.7145	33.7641	2.9504	**	***
hsa-miR-744*	38.085	34.5129	3.57208	**	***
hsa-miR-766	34.3083	31.5886	2.71971	**	***
hsa-miR-769-5p	40	34.5644	5.43562	**	***
hsa-miR-885-3p	33.9378	35.0334	-1.09564	**
hsa-miR-885-5p	34.0769	35.6387	-1.56185	**
hsa-miR-934	33.5371	33.8001	-0.262965
hsa-miR-940	35.2634	33.5544	1.70901	**
